# Supplementary material
Source: PubMed Central journal article supplement (PMC3191297)
Supplement: NIHMS319181-supplement-01.pdf [file NIHMS319181-supplement-01.pdf]

**Supplementary Table 1. MHC type of NHP used in the study**

|                                        | NHP # | MHC     |         |         |         |
|----------------------------------------|-------|---------|---------|---------|---------|
|                                        |       | A Hap 1 | A Hap 2 | B Hap 1 | B Hap 2 |
| <b>Group 1. Ad5 naïve</b>              | 006   | A054    | A701b   | B028    | B076    |
|                                        | 062   | A003a   | A056a   | B001b   | B056b   |
|                                        | 066   | A018e   | A091    | B001b   | B017    |
|                                        | 129   | A004a   | A052    | B010    | B056a   |
|                                        | 181   | A018a   | A041    | B015c   | B023    |
|                                        | 208   | A051    | A063    | B015b   | B048b   |
|                                        | 210   | A019c   | A063    | B015b   | B039a   |
| <b>Group 2. Ad5 immune</b>             | 124   | A049    | A052    | B002a   | B003    |
|                                        | 125   | A040    | A052    | B039a   | B003    |
|                                        | 134   | A052    | A063    | B002b   | B003    |
|                                        | 145   | A004a   | A019c   | B024    | B024    |
|                                        | 214   | A003c   | A057    | B013b   | B048b   |
|                                        | 230   | A018a   | A049    | B001a   | B015c   |
|                                        | 236   | A007a   | A007b   | B002a   | B080    |
| <b>Group 3. Control<br/>Ad5 immune</b> | 001   | A003d   | A041    | B013b   | B017    |
|                                        | 028   | A053    | A701a   | B001a   | B056b   |
|                                        | 099   | A018d   | A019a   | B013a   | B023    |
|                                        | 200   | A032b   | A041    | B069c   | B075a   |
