# Supplementary material
Source: PubMed Central journal article supplement (PMC3191297)

**Supplementary Figure 1. Breadth of transgene specific cellular immunity.** Ad5 naïve (n=3, grey), Ad5 immune (n=2, white) were vaccinated four times with  $10^{10}$  VP of SIV Ad5 [E1-, E2b-]-gag/nef and three times with  $10^{10}$  VP of HIV-1 Ad5 [E1-, E2b-]-pol. PBMC were stimulated with Gag (A), Pol (B) or Nef (C) peptide pools and assessed for IFN- $\gamma$  secretion by ELISpot. For positive controls, splenocytes were exposed to Concanavalin A (Con A) (data not shown). Error bars indicate the SEM.

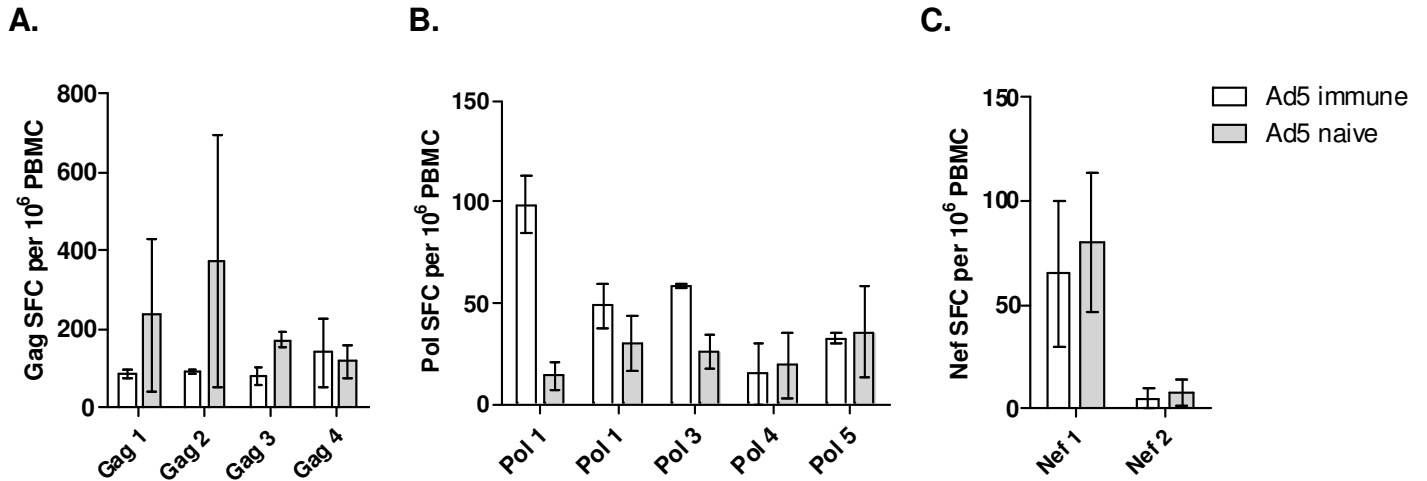

Supplement: NIHMS319181-supplement-02.pdf [file NIHMS319181-supplement-02.pdf]
